# Supplementary material for: Exogenous hydrogen sulfide improves salt stress tolerance of Reaumuria soongorica seedlings by regulating active oxygen metabolism
Source: PeerJ. 2023 Aug 24;11:e15881. doi: 10.7717/peerj.15881 (PMC10460565; doi:10.7717/peerj.15881)
Supplement: Supplemental Information 1 [file peerj-11-15881-s001.xlsx]

## Sheet: plant height
	days after treatment /d		different concentration of NaHS
	0	Repetitions	CK	S	S+T1	S+T2	S+T3	S+T4	S+T5	S+T6	S+T7
		1	10.4277	11.2129	11	9.9	12.8	11.6106	10.2865	9.55254	9.8
		2	12.3361	10.8199	10.06	9.99667	14.3	10.2	10.4	10.5437	11.7
		3	13.3134	11.1963	10.8416	9.75838	12.9	15.9	9.8	14.5	14.6
		AVE	12.0257	11.0764	10.6339	9.88502	13.3333	12.5702	10.1622	11.5321	12.0333
		SD	1.19834	0.181481	0.410913	0.0978562	0.684755	2.42393	0.260248	2.13729	1.97372
	7	Repetitions	CK	S	S+T1	S+T2	S+T3	S+T4	S+T5	S+T6	S+T7
		1	13.2077	13.8729	13.8	12.3709	15.6161	14.3706	13.1065	12.2825	12.4461
		2	14.9136	13.2899	12.8	12.8067	16.759	12.7034	12.7723	13.2937	12.9992
		3	16.0934	13.9063	13.6316	11.5784	15.3	18.1442	12.3429	16.8692	17.1678
		AVE	14.7382	13.6897	13.4105	12.252	15.8917	15.0727	12.7406	14.1485	14.2044
		SD	1.18458	0.283035	0.43716	0.508449	0.626688	2.27602	0.312561	1.96765	2.1076
	14	Repetitions	CK	S	S+T1	S+T2	S+T3	S+T4	S+T5	S+T6	S+T7
		1	15.9824	15.0194	16.6049	14.4327	18.1634	16.616	16.0442	13.9048	14.9582
		2	17.8963	14.4455	14.6286	15.3	19.5154	15.5389	15.485	15.4342	13.5744
		3	19.1588	15.5021	16.4481	14.4162	18.6261	21.314	14.9714	20.0667	20.2492
		AVE	17.6792	14.989	15.8939	14.7163	18.7683	17.8229	15.5002	16.4685	16.2606
		SD	1.3058	0.431879	0.896974	0.412783	0.561015	2.50737	0.438071	2.61976	2.87641
	21	Repetitions	CK	S	S+T1	S+T2	S+T3	S+T4	S+T5	S+T6	S+T7
		1	18.3132	15.3634	17.9512	15.3491	19.714	17.5141	16.8351	14.1365	15.0723
		2	19.7743	14.6767	15.4286	16.32	20.7282	16.3329	16.6153	16.8987	14.4947
		3	21.3483	15.8441	17.0114	16.1189	19.7348	22.9535	15.4286	20.7282	21.4598
		AVE	19.812	15.2947	16.7971	15.9293	20.059	18.9335	16.293	17.2545	17.009
		SD	1.23938	0.479058	1.04096	0.418427	0.473284	2.88318	0.617779	2.70278	3.15604
	28	Repetitions	CK	S	S+T1	S+T2	S+T3	S+T4	S+T5	S+T6	S+T7
		1	19.4231	15.478	18.2878	15.5782	20.2677	17.9632	17.174	14.4841	15.6433
		2	20.4372	14.7922	15.7714	16.7733	21.1692	16.6732	17.1805	17.462	15.0699
		3	22.2242	16.072	17.462	16.573	20.1783	23.3907	15.6571	21.2795	21.6799
		AVE	20.6948	15.4474	17.1738	16.3082	20.5384	19.3423	16.6705	17.7419	17.4644
		SD	1.15796	0.522928	1.04733	0.522615	0.44755	2.91066	0.716586	2.78124	2.99001
	35	Repetitions	CK	S	S+T1	S+T2	S+T3	S+T4	S+T5	S+T6	S+T7
		1	20.2	15.65	18.4	15.75	20.6	18.3	17.4	14.6	16.1
		2	21.1	14.85	16	17	21.5	16.9	17.35	17.8	15.3
		3	23.1	16.3	17.8	16.8	20.4	23.5	16	21.5	21.9
		AVE	21.4667	15.6	17.4	16.5167	20.8333	19.5667	16.9167	17.9667	17.7667
		SD	1.21198	0.593015	1.0198	0.548229	0.478423	2.83941	0.648503	2.81938	2.9409
	Explanation：This table is the raw data of plant height determination. We set up three repetitions in each experiment to ensure the reliability of the results, and finally take the average as the final result.

## Sheet: ground diameter
	days after treatment /d		different concentration of NaHS
	0	Repetitions	CK	S	S+T1	S+T2	S+T3	S+T4	S+T5	S+T6	S+T7
		1	0.89	0.72	0.64	0.71	0.7	0.76	0.78	0.73	0.54
		2	0.62	0.7	0.51	0.56	0.68	0.54	0.79	0.76	0.79
		3	1.07	0.73	0.78	0.86	0.94	1.04	0.52	0.92	0.89
		AVE	0.86	0.716667	0.643333	0.71	0.773333	0.78	0.696667	0.803333	0.74
		SD	0.184932	0.0124722	0.110252	0.122474	0.118134	0.204613	0.124989	0.0834	0.147196
	7	Repetitions	CK	S	S+T1	S+T2	S+T3	S+T4	S+T5	S+T6	S+T7
		1	1.02	0.91	0.81	0.86	0.86	0.89	0.9	0.86	0.68
		2	0.88	0.87	0.72	0.72	0.91	0.72	0.96	0.89	0.96
		3	1.29	0.92	0.97	1.05	1.11	1.23	0.72	1.16	1.11
		AVE	1.06333	0.9	0.833333	0.876667	0.96	0.946667	0.86	0.97	0.916667
		SD	0.170163	0.0216025	0.103387	0.135236	0.108012	0.212027	0.10198	0.134907	0.178201
	14	Repetitions	CK	S	S+T1	S+T2	S+T3	S+T4	S+T5	S+T6	S+T7
		1	1.13	0.92	0.86	0.92	0.98	1.17	1.17	0.93	0.92
		2	1.18	0.95	0.89	0.96	1.07	0.9	1.09	1.09	1.02
		3	1.5	0.97	1.14	1.15	1.34	1.48	0.92	1.48	1.22
		AVE	1.27	0.946667	0.963333	1.01	1.13	1.18333	1.06	1.16667	1.05333
		SD	0.163911	0.020548	0.125521	0.100333	0.152971	0.236972	0.104243	0.230988	0.124722
	21	Repetitions	CK	S	S+T1	S+T2	S+T3	S+T4	S+T5	S+T6	S+T7
		1	1.34	1.02	0.96	1.03	1.19	1.22	1.22	1.01	1.1
		2	1.36	0.97	0.92	1.13	1.2	0.96	1.37	1.27	1.11
		3	1.55	1.03	1.21	1.2	1.36	1.72	0.94	1.55	1.29
		AVE	1.41667	1.00667	1.03	1.12	1.25	1.3	1.17667	1.27667	1.16667
		SD	0.0946338	0.0262467	0.128323	0.0697615	0.0778888	0.315383	0.178201	0.220504	0.0873053
	28	Repetitions	CK	S	S+T1	S+T2	S+T3	S+T4	S+T5	S+T6	S+T7
		1	1.47	1.11	1.04	1.08	1.3	1.33	1.28	1.06	1.18
		2	1.5	0.99	0.98	1.18	1.29	1.02	1.43	1.29	1.17
		3	1.68	1.04	1.24	1.32	1.39	1.75	0.98	1.65	1.32
		AVE	1.55	1.04667	1.08667	1.19333	1.32667	1.36667	1.23	1.33333	1.22333
		SD	0.0927362	0.0492161	0.111156	0.0984322	0.0449691	0.299147	0.187083	0.242808	0.0684755
	35	Repetitions	CK	S	S+T1	S+T2	S+T3	S+T4	S+T5	S+T6	S+T7
		1	1.62	1.16	1.09	1.1	1.37	1.42	1.34	1.12	1.21
		2	1.6	1.01	1.05	1.25	1.4	1.08	1.51	1.33	1.23
		3	1.79	1.08	1.26	1.39	1.43	1.77	1.01	1.73	1.38
		AVE	1.67	1.08333	1.13333	1.24667	1.4	1.42333	1.28667	1.39333	1.27333
		SD	0.0852447	0.0612826	0.0910433	0.118415	0.0244949	0.281701	0.207579	0.253026	0.0758654
	Explanation：This table is the raw data of ground diameter determination. We set up three repetitions in each experiment to ensure the reliability of the results, and finally take the average as the final result.

## Sheet: specific leaf area
	days after treatment /d		different concentration of NaHS
	0	Repetitions	CK	S	S+T1	S+T2	S+T3	S+T4	S+T5	S+T6	S+T7
		1	516.649	511.624	486.689	546.371	513.012	525.25	531.256	536.862	505.89
		2	523.804	505.281	521.096	497.596	547.792	539.082	546.533	543.374	505.603
		3	528.899	499.038	505.502	484.462	499.137	539.433	497.559	519.333	502.271
		AVE	523.118	505.314	504.429	509.476	519.98	534.588	525.116	533.19	504.588
		SD	5.02453	5.1382	14.0667	26.6337	20.4651	6.60462	20.4595	10.1523	1.64221
	7	Repetitions	CK	S	S+T1	S+T2	S+T3	S+T4	S+T5	S+T6	S+T7
		1	530.993	390.911	462.795	495.111	528.928	493.03	497.767	499.371	478.596
		2	490.59	398.99	487.757	514.802	557.252	522.619	494.489	461.259	464.583
		3	521.031	439.733	480.137	518.904	532.403	490.876	504.407	467.851	497.617
		AVE	514.205	409.878	476.896	509.606	539.528	502.175	498.888	476.16	480.265
		SD	17.1864	21.3669	10.4452	10.3852	12.613	14.4826	4.1258	16.6315	13.5377
	14	Repetitions	CK	S	S+T1	S+T2	S+T3	S+T4	S+T5	S+T6	S+T7
		1	522.439	440.015	490.027	519.955	548.632	570.334	534.936	489.731	508.077
		2	533.774	462.044	505.78	520.427	523.766	546.989	506.829	504.441	506.093
		3	530.475	473.071	483.295	509.623	555.163	531.645	504.606	507.094	497.034
		AVE	528.896	458.377	493.034	516.668	542.52	549.656	515.457	500.422	503.735
		SD	4.76028	13.7417	9.42228	4.98559	13.5266	15.9068	13.8034	7.63706	4.80664
	21	Repetitions	CK	S	S+T1	S+T2	S+T3	S+T4	S+T5	S+T6	S+T7
		1	525.624	486.568	487.289	540.077	549.998	545.097	579.599	518.573	520.099
		2	523.955	454.506	502.833	539.024	537.485	581.31	520.538	555.393	472.095
		3	539.89	474.625	526.496	511.407	565.48	521.206	463.743	508.325	557.622
		AVE	529.823	471.9	505.539	530.169	550.988	549.204	521.293	527.431	516.605
		SD	7.15088	13.2304	16.1202	13.2741	11.4502	24.7085	47.301	20.2105	35.0034
	28	Repetitions	CK	S	S+T1	S+T2	S+T3	S+T4	S+T5	S+T6	S+T7
		1	526.982	485.636	539.721	551.19	584.468	585.867	522.735	527.275	536.951
		2	541.915	478.109	502.699	590.109	594.787	597.871	599.799	544.207	551.338
		3	566.124	465.837	529.38	562.926	532.719	598.303	560.723	572.828	555.151
		AVE	545.007	476.527	523.933	568.075	570.658	594.014	561.085	548.103	547.814
		SD	16.1285	8.15993	15.5971	16.3005	27.1557	5.76309	31.4623	18.7998	7.83684
	Explanation：This table is the raw data of specific leaf area determination. We set up three repetitions in each experiment to ensure the reliability of the results, and finally take the average as the final result.

## Sheet: leaf relative water content
	days after treatment /d		different concentration of NaHS
	0	Repetitions	CK	S	S+T1	S+T2	S+T3	S+T4	S+T5	S+T6	S+T7
		1	70.2959	70.6345	68.9103	69.6333	70.2151	71.3187	68.1827	68.768	69.0148
		2	67.8906	67.8477	72.0839	67.7531	71.3032	70.2622	70.0177	70.2605	70.2002
		3	69.5471	68.9692	67.5064	70.7327	69.5299	68.3555	70.5624	69.0926	70.337
		AVE	69.2445	69.1505	69.5002	69.373	70.3494	69.9788	69.5876	69.3737	69.8506
		SD	1.005	1.14492	1.91476	1.23027	0.730133	1.2262	1.01798	0.640874	0.593685
	7	Repetitions	CK	S	S+T1	S+T2	S+T3	S+T4	S+T5	S+T6	S+T7
		1	68.8033	65.9454	67.3922	68.8348	70.7349	69.3471	69.0894	69.3135	69.6264
		2	67.4391	66.6535	70.5931	70.4726	69.3821	71.0431	70.049	70.9736	70.3617
		3	71.6588	67.4138	70.1532	70.4696	71.5269	71.0753	71.1858	69.6047	70.8542
		AVE	69.3004	66.6709	69.3795	69.9257	70.548	70.4885	70.1081	69.9639	70.2808
		SD	1.7582	0.599593	1.41666	0.771375	0.885561	0.807216	0.856891	0.723786	0.50451
	14	Repetitions	CK	S	S+T1	S+T2	S+T3	S+T4	S+T5	S+T6	S+T7
		1	70.8039	67.0449	70.5911	67.7857	70.6957	70.6784	69.2298	67.6474	68.2758
		2	68.71	68.4684	69.5451	71.5128	71.7654	71.3005	72.6665	68.9276	72.2621
		3	69.9752	66.198	69.7433	71.5424	70.7021	71.6007	70.2966	72.6359	70.11
		AVE	69.8297	67.2371	69.9598	70.2803	71.0544	71.1932	70.731	69.737	70.216
		SD	0.861012	0.936811	0.453629	1.76402	0.502764	0.384092	1.43626	2.11542	1.62911
	21	Repetitions	CK	S	S+T1	S+T2	S+T3	S+T4	S+T5	S+T6	S+T7
		1	69.5326	66.9672	69.9855	69.8598	70.3745	72.5283	70.7905	71.728	69.3484
		2	69.6917	68.1429	69.2189	70.6721	71.5817	72.6108	70.9816	70.4393	70.0153
		3	68.7866	67.3264	71.0001	71.9524	71.4577	70.2067	70.7245	70.4215	71.4999
		AVE	69.3369	67.4788	70.0682	70.8281	71.138	71.7819	70.8322	70.8629	70.2879
		SD	0.394564	0.491925	0.729517	0.861408	0.542189	1.11436	0.109014	0.611746	0.899244
	28	Repetitions	CK	S	S+T1	S+T2	S+T3	S+T4	S+T5	S+T6	S+T7
		1	70.5438	67.9778	71.7516	72.0009	72.5813	69.2264	71.8314	71.1207	70.3749
		2	67.8452	67.7506	70.9161	72.79	72.0993	71.6595	71.7753	69.634	70.1272
		3	70.1175	69.294	70.0918	70.8819	70.5343	73.1546	69.8341	72.5488	71.0915
		AVE	69.5022	68.3408	70.9198	71.891	71.7383	71.3468	71.1469	71.1011	70.5312
		SD	1.18449	0.680397	0.677589	0.782842	0.873834	1.61888	0.928599	1.19004	0.408873
	Explanation：This table is the raw data of leaf relative water content determination. We set up three repetitions in each experiment to ensure the reliability of the results, and finally take the average as the final result.

## Sheet:  CAT activity
	days after treatment /d		different concentration of NaHS
	0	Repetitions	CK	S	S+T1	S+T2	S+T3	S+T4	S+T5	S+T6	S+T7
		1	104.625	105.625	101.75	92	108.5	95.125	106.375	110.5	100.875
		2	110	97.5	107.25	103.75	107.5	114.875	98	99.875	93.625
		3	97.75	111.25	107	113.375	99	102.625	108.625	98.875	117.25
		AVE	104.125	104.792	105.333	103.042	105	104.208	104.333	103.083	103.917
		SD	5.01352	5.64426	2.53585	8.74067	4.26224	8.14026	4.57158	5.26024	9.88177
	7	Repetitions	CK	S	S+T1	S+T2	S+T3	S+T4	S+T5	S+T6	S+T7
		1	102.375	150	255.875	304.25	270.625	232.875	240.75	233.875	206.625
		2	113.875	192.5	280.875	288	295.75	299.625	214.25	178.25	193.125
		3	122.5	163.375	208.125	293.75	228.375	208.375	250.625	209.25	198.75
		AVE	112.917	168.625	248.292	295.333	264.917	246.958	235.208	207.125	199.5
		SD	8.2439	17.7432	30.1802	6.72784	27.8003	38.5607	15.3583	22.7585	5.53681
	14	Repetitions	CK	S	S+T1	S+T2	S+T3	S+T4	S+T5	S+T6	S+T7
		1	106.125	187.375	208	269.25	263.5	237.25	248.75	232.5	249.875
		2	88.375	209.75	216	309.125	264.25	228.625	227.625	199	150.625
		3	121.5	152.625	266.875	320.875	254.125	281	231.375	167.625	196.75
		AVE	105.333	183.25	230.292	299.75	260.625	248.958	235.917	199.708	199.083
		SD	13.5348	23.5029	26.0737	22.0938	4.60638	22.9289	9.20277	26.4898	40.5522
	21	Repetitions	CK	S	S+T1	S+T2	S+T3	S+T4	S+T5	S+T6	S+T7
		1	114.25	178	206.625	302.5	272.5	235.5	208.75	178.75	175
		2	111.25	167.75	220.375	287.375	249	221.125	218.25	154.75	168.5
		3	107.375	152.625	220	282	248	251.75	205.25	211.375	179
		AVE	110.958	166.125	215.667	290.625	256.5	236.125	210.75	181.625	174.167
		SD	2.81427	10.4228	6.39526	8.67888	11.3211	12.5104	5.49242	23.2063	4.32692
	28	Repetitions	CK	S	S+T1	S+T2	S+T3	S+T4	S+T5	S+T6	S+T7
		1	106.25	154.75	209.75	286.5	191.75	228	201.125	156.5	146.375
		2	104.75	101.5	163.75	214.5	242.875	192.375	191.125	153.25	156.125
		3	117	173.875	154.5	255.25	216.125	171.625	186.125	181.5	133
		AVE	109.333	143.375	176	252.083	216.917	197.333	192.792	163.75	145.167
		SD	5.45563	30.6222	24.1618	29.479	20.8792	23.2805	6.2361	12.6211	9.47933
	Explanation：This table is the raw data of CAT activity determination. We set up three repetitions in each experiment to ensure the reliability of the results, and finally take the average as the final result.

## Sheet: POD activity
	days after treatment /d		different concentration of NaHS
	0	Repetitions	CK	S	S+T1	S+T2	S+T3	S+T4	S+T5	S+T6	S+T7
		1	71.25	67.95	64.5	54.12	62.55	55.05	67.05	68.55	60.3
		2	62.25	54.15	67.95	60.45	60.75	69.09	65.25	66.96	62.1
		3	58.35	66.75	61.29	77.55	71.25	69	70.65	57.6	59.55
		AVE	63.95	62.95	64.58	64.04	64.85	64.38	67.65	64.37	60.65
		SD	5.40185	6.24179	2.71952	9.89637	4.58476	6.59741	2.24499	4.83092	1.07005
	7	Repetitions	CK	S	S+T1	S+T2	S+T3	S+T4	S+T5	S+T6	S+T7
		1	68.4	136.35	171	180.45	176.1	174.6	163.5	162.15	154.5
		2	73.2	125.55	174.3	184.65	171.3	168.3	167.4	158.25	158.1
		3	76.5	128.25	175.8	185.25	172.26	167.7	166.95	161.55	156.9
		AVE	72.7	130.05	173.7	183.45	173.22	170.2	165.95	160.65	156.5
		SD	3.32566	4.58912	2.00499	2.13542	2.07384	3.1209	1.74213	1.71464	1.49666
	14	Repetitions	CK	S	S+T1	S+T2	S+T3	S+T4	S+T5	S+T6	S+T7
		1	59.85	143.25	165.72	167.55	180.45	178.95	167.25	160.35	155.25
		2	66.75	135.6	174.75	182.25	186.75	180.15	169.05	163.95	155.85
		3	59.55	140.7	169.35	178.35	193.95	183.75	159.75	168.75	161.85
		AVE	62.05	139.85	169.94	176.05	187.05	180.95	165.35	164.35	157.65
		SD	3.32566	3.18041	3.71001	6.21772	5.51543	2.03961	4.02741	3.44093	2.97993
	21	Repetitions	CK	S	S+T1	S+T2	S+T3	S+T4	S+T5	S+T6	S+T7
		1	49.65	116.25	158.55	169.35	168.6	150.75	150.6	153	152.685
		2	54.75	110.25	155.25	173.85	159.9	159.45	151.8	151.8	142.65
		3	51.0555	108.525	152.1	170.85	162.9	164.55	157.8	158.13	142.05
		AVE	51.8185	111.675	155.3	171.35	163.8	158.25	153.4	154.31	145.795
		SD	2.15083	3.31078	2.63344	1.87083	3.60832	5.69737	3.1496	2.74521	4.87812
	28	Repetitions	CK	S	S+T1	S+T2	S+T3	S+T4	S+T5	S+T6	S+T7
		1	58.65	74.4	142.5	147.9	140.85	134.4	130.5	134.46	121.5
		2	51.75	76.8	140.1	139.2	140.97	135.75	132.15	132.15	124.5
		3	56.25	73.95	139.2	146.4	142.17	139.35	132.3	131.4	120.57
		AVE	55.55	75.05	140.6	144.5	141.33	136.5	131.65	132.67	122.19
		SD	2.86007	1.251	1.39284	3.79737	0.595987	2.08926	0.815475	1.30223	1.67696
	Explanation：This table is the raw data of POD activity determination. We set up three repetitions in each experiment to ensure the reliability of the results, and finally take the average as the final result.

## Sheet: SOD activity
	days after treatment /d		different concentration of NaHS
	0	Repetitions	CK	S	S+T1	S+T2	S+T3	S+T4	S+T5	S+T6	S+T7
		1	441.983	482.539	447.915	463.717	441.448	443.592	432.991	443.323	432.729
		2	422.677	446.288	421.153	456.986	416.121	440.914	454.215	396.172	447.372
		3	455.321	435.614	469.702	442.518	444.937	424.461	419.384	438.52	419.636
		AVE	439.993	454.814	446.257	454.407	434.169	436.322	435.53	426.005	433.246
		SD	13.401	20.0835	19.8545	8.84441	12.8411	8.45784	14.3324	21.1859	11.3288
	7	Repetitions	CK	S	S+T1	S+T2	S+T3	S+T4	S+T5	S+T6	S+T7
		1	422.886	545.944	663.565	717.746	742.538	693.854	676.205	703.871	668.897
		2	454.395	535.437	668.515	759.445	718.985	723.13	691.472	685.557	677.367
		3	441.613	559.196	747.264	719.812	708.735	691.869	680.864	674.274	666.606
		AVE	439.632	546.859	693.115	732.334	723.419	702.951	682.847	687.901	670.957
		SD	12.9395	9.72117	38.3426	19.1884	14.1519	14.2919	6.38871	12.1962	4.62791
	14	Repetitions	CK	S	S+T1	S+T2	S+T3	S+T4	S+T5	S+T6	S+T7
		1	451.383	536.884	606.179	679.539	736.355	714.069	649.294	636.815	623.546
		2	404.59	563.749	644.987	717.665	716.064	728.979	627.01	624.929	641.777
		3	453.171	478.328	608.87	692.514	764.117	700.27	667.564	664.974	629.098
		AVE	436.381	526.32	620.012	696.573	738.846	714.439	647.956	642.239	631.474
		SD	22.4919	35.6638	17.6942	15.8271	19.6963	11.7232	16.5829	16.792	7.62975
	21	Repetitions	CK	S	S+T1	S+T2	S+T3	S+T4	S+T5	S+T6	S+T7
		1	416.555	527.481	654.696	712.959	681.588	659.027	649.538	705.908	672.645
		2	425.703	502.6	659.896	682.039	785.264	748.891	678.892	649.11	630.567
		3	396.83	510.658	640.19	739.971	715.801	652.111	669.986	634.733	690.202
		AVE	413.029	513.579	651.594	711.656	727.551	686.676	666.139	663.25	664.471
		SD	12.0483	10.3656	8.33848	23.6686	43.1332	44.0827	12.2889	30.7293	25.0225
	28	Repetitions	CK	S	S+T1	S+T2	S+T3	S+T4	S+T5	S+T6	S+T7
		1	415.81	483.601	703.017	670.61	705.86	656.132	711.995	692.963	627.065
		2	436.418	456.811	723.602	711.174	663.71	747.876	661.807	656.886	633.206
		3	421.009	524.014	637.578	743.123	786.234	675.639	649.016	642.349	616.73
		AVE	424.412	488.142	688.066	708.302	718.602	693.216	674.273	664.066	625.667
		SD	8.75045	27.6227	36.6761	29.6729	50.8251	39.4628	27.18	21.2778	6.79864
	Explanation：This table is the raw data of SOD activity determination. We set up three repetitions in each experiment to ensure the reliability of the results, and finally take the average as the final result.

## Sheet: MDA content
	days after treatment /d		different concentration of NaHS
	0	Repetitions	CK	S	S+T1	S+T2	S+T3	S+T4	S+T5	S+T6	S+T7
		1	0.188333	0.201067	0.18864	0.186089	0.215543	0.205528	0.204686	0.209367	0.208492
		2	0.219695	0.187155	0.217101	0.183735	0.199582	0.19997	0.203255	0.216653	0.204375
		3	0.218623	0.229501	0.193153	0.20457	0.202444	0.195517	0.203873	0.188866	0.214944
		AVE	0.208884	0.205908	0.199631	0.191465	0.205856	0.200338	0.203938	0.204962	0.20927
		SD	0.0145381	0.0176233	0.0124896	0.00931657	0.00694845	0.00409526	0.000586009	0.0117639	0.00434974
	7	Repetitions	CK	S	S+T1	S+T2	S+T3	S+T4	S+T5	S+T6	S+T7
		1	0.23773	0.382726	0.384331	0.33712	0.284367	0.250186	0.293577	0.321211	0.335907
		2	0.189552	0.37341	0.366497	0.356165	0.281615	0.258573	0.305249	0.32366	0.335722
		3	0.197966	0.441948	0.386996	0.356188	0.290002	0.243429	0.314356	0.313762	0.343396
		AVE	0.208416	0.399361	0.379275	0.349824	0.285328	0.250729	0.304394	0.319544	0.338342
		SD	0.0210108	0.0303525	0.00910044	0.00898333	0.00349076	0.00619444	0.00850451	0.00420919	0.00357475
	14	Repetitions	CK	S	S+T1	S+T2	S+T3	S+T4	S+T5	S+T6	S+T7
		1	0.218607	0.331925	0.302207	0.310497	0.234574	0.276183	0.274884	0.302198	0.325205
		2	0.204999	0.350348	0.319595	0.308114	0.217864	0.273802	0.264149	0.294489	0.307454
		3	0.202382	0.362605	0.308742	0.288177	0.218366	0.254504	0.268666	0.307806	0.319771
		AVE	0.208663	0.348293	0.310181	0.302263	0.223601	0.268163	0.269233	0.301498	0.317477
		SD	0.00711241	0.0126091	0.00717121	0.0100075	0.00776155	0.00970716	0.00440085	0.00545915	0.00742619
	21	Repetitions	CK	S	S+T1	S+T2	S+T3	S+T4	S+T5	S+T6	S+T7
		1	0.215601	0.325555	0.301897	0.283187	0.218324	0.245636	0.272922	0.297084	0.320487
		2	0.215406	0.332393	0.290343	0.269499	0.233298	0.254413	0.255764	0.284632	0.294571
		3	0.228248	0.337557	0.283441	0.277832	0.194239	0.26936	0.246008	0.30129	0.295162
		AVE	0.219752	0.331835	0.291894	0.276839	0.215287	0.25647	0.258231	0.294335	0.303407
		SD	0.00600834	0.00491566	0.007614	0.00563201	0.0160897	0.00979386	0.0111252	0.00707289	0.01208
	28	Repetitions	CK	S	S+T1	S+T2	S+T3	S+T4	S+T5	S+T6	S+T7
		1	0.188678	0.324753	0.275503	0.267457	0.21885	0.239562	0.244759	0.268286	0.301053
		2	0.191341	0.331881	0.273707	0.253014	0.199054	0.243882	0.243272	0.278548	0.293201
		3	0.185586	0.326074	0.283809	0.282968	0.224972	0.229997	0.237608	0.264045	0.292502
		AVE	0.188535	0.327569	0.277673	0.267813	0.214292	0.237814	0.24188	0.270293	0.295585
		SD	0.00235164	0.00309614	0.00440032	0.0122313	0.011061	0.00580177	0.00308092	0.00608853	0.00387674
	Explanation：This table is the raw data of MDA content determination. We set up three repetitions in each experiment to ensure the reliability of the results, and finally take the average as the final result.

## Sheet: proline content
	days after treatment /d		different concentration of NaHS
	0	Repetitions	CK	S	S+T1	S+T2	S+T3	S+T4	S+T5	S+T6	S+T7
		1	0.0632148	0.0633216	0.0617196	0.0619332	0.0648168	0.0605448	0.063642	0.0610788	0.0601176
		2	0.06471	0.0624672	0.0612924	0.0649236	0.0621468	0.0640692	0.0642828	0.0602244	0.0634284
		3	0.0611856	0.060438	0.0635352	0.0639624	0.061506	0.0622536	0.0626808	0.062574	0.0638556
		AVE	0.0630368	0.0620756	0.0621824	0.0636064	0.0628232	0.0622892	0.0635352	0.0612924	0.0624672
		SD	0.00144432	0.00120935	0.000972343	0.00124651	0.00143376	0.00143905	0.000658359	0.000971039	0.00167055
	7	Repetitions	CK	S	S+T1	S+T2	S+T3	S+T4	S+T5	S+T6	S+T7
		1	0.063642	0.147694	0.113304	0.105935	0.093546	0.106896	0.0963228	0.103372	0.125372
		2	0.0670596	0.129324	0.118964	0.107644	0.108712	0.0933324	0.107216	0.103585	0.106789
		3	0.0648168	0.117896	0.116508	0.110954	0.118217	0.0840408	0.0911964	0.103478	0.108284
		AVE	0.0651728	0.131638	0.116259	0.108178	0.106825	0.0947564	0.0982452	0.103478	0.113482
		SD	0.00141776	0.0122742	0.00231756	0.00208374	0.0101598	0.00938477	0.00667991	8.72018e-05	0.00842991
	14	Repetitions	CK	S	S+T1	S+T2	S+T3	S+T4	S+T5	S+T6	S+T7
		1	0.0640692	0.131674	0.0990996	0.0958956	0.0897012	0.0932256	0.085536	0.0911964	0.10177
		2	0.0603312	0.101556	0.0995268	0.0934392	0.0904488	0.0877788	0.088206	0.0926916	0.106148
		3	0.0658848	0.122702	0.102304	0.100168	0.0921576	0.0886332	0.0848952	0.0880992	0.102197
		AVE	0.0634284	0.118644	0.10031	0.0965008	0.0907692	0.0898792	0.0862124	0.0906624	0.103372
		SD	0.00231208	0.0126259	0.00142044	0.00277999	0.00102809	0.00239183	0.00143376	0.00191249	0.00197122
	21	Repetitions	CK	S	S+T1	S+T2	S+T3	S+T4	S+T5	S+T6	S+T7
		1	0.0662052	0.102624	0.0841476	0.082866	0.0669528	0.0762444	0.0717588	0.079128	0.0877788
		2	0.0627876	0.105508	0.089274	0.0811572	0.0678072	0.0723996	0.0703704	0.0761376	0.090342
		3	0.0682344	0.11042	0.0858564	0.0731472	0.0691956	0.0742152	0.0720792	0.081798	0.0880992
		AVE	0.0657424	0.106184	0.086426	0.0790568	0.0679852	0.0742864	0.0714028	0.0790212	0.08874
		SD	0.0022476	0.0032186	0.00213125	0.00423655	0.00092423	0.00157044	0.000741643	0.00231208	0.00114031
	28	Repetitions	CK	S	S+T1	S+T2	S+T3	S+T4	S+T5	S+T6	S+T7
		1	0.059904	0.0787008	0.0654576	0.0677004	0.0570204	0.0555252	0.0596904	0.0619332	0.0690888
		2	0.0624672	0.0873516	0.0699432	0.0666324	0.0595836	0.0585156	0.0597972	0.0649236	0.0662052
		3	0.0653508	0.0864972	0.0687684	0.068982	0.0580884	0.0607584	0.0628944	0.0671664	0.0675936
		AVE	0.062574	0.0841832	0.0680564	0.0677716	0.0582308	0.0582664	0.060794	0.0646744	0.0676292
		SD	0.00222493	0.0038923	0.00189919	0.000960541	0.00105126	0.0021437	0.00148585	0.0021437	0.00117749
	Explanation：This table is the raw data of proline content determination. We set up three repetitions in each experiment to ensure the reliability of the results, and finally take the average as the final result.

## Sheet: soluble sugar content
	days after treatment /d		different concentration of NaHS
	0	Repetitions	CK	S	S+T1	S+T2	S+T3	S+T4	S+T5	S+T6	S+T7
		1	8.06482	8.06735	7.99352	8.12094	8.05355	8.06183	8.08713	8.01284	8.00318
		2	7.98616	7.97052	7.92452	7.99743	8.02641	7.96523	8.05217	7.97972	8.09449
		3	8.00226	8.01169	7.85897	7.94315	8.06436	8.04849	7.96592	7.99858	8.02825
		AVE	8.01775	8.01652	7.92567	8.02051	8.04811	8.02518	8.03507	7.99705	8.04197
		SD	0.0339286	0.0396779	0.0549358	0.0743941	0.015964	0.0427418	0.0509391	0.0135646	0.0385195
	7	Repetitions	CK	S	S+T1	S+T2	S+T3	S+T4	S+T5	S+T6	S+T7
		1	8.03561	7.52179	8.12163	8.4595	8.25388	8.24583	8.1007	8.01169	7.66991
		2	8.04711	7.51719	8.16786	8.42914	8.26331	8.20512	8.11128	7.92797	7.71936
		3	8.1007	7.57009	8.10737	8.36267	8.25848	8.18741	8.06804	7.95787	7.75915
		AVE	8.06114	7.53636	8.13229	8.4171	8.25856	8.21279	8.09334	7.96584	7.71614
		SD	0.0283644	0.0239269	0.025819	0.0404366	0.00385016	0.0244582	0.0184038	0.0346404	0.0365032
	14	Repetitions	CK	S	S+T1	S+T2	S+T3	S+T4	S+T5	S+T6	S+T7
		1	8.24606	7.87783	8.57151	9.00897	8.33783	8.34634	8.39717	8.40131	8.24698
		2	8.2019	7.85023	8.54966	8.90156	8.32173	8.29114	8.3652	8.37003	8.24261
		3	8.13911	7.86449	8.64051	8.96067	8.33668	8.32702	8.44225	8.34358	8.28401
		AVE	8.19569	7.86418	8.58723	8.95707	8.33208	8.3215	8.40154	8.37164	8.25787
		SD	0.0438824	0.0112697	0.0387186	0.0439239	0.0073336	0.0228708	0.0316069	0.0235957	0.018572
	21	Repetitions	CK	S	S+T1	S+T2	S+T3	S+T4	S+T5	S+T6	S+T7
		1	8.59313	7.99582	9.38755	9.41952	8.80335	8.62694	8.6918	8.59313	8.47284
		2	8.57887	7.98616	9.26335	9.35052	8.70652	8.59543	8.67041	8.55817	8.48572
		3	8.38797	7.91026	9.49841	9.37651	8.74769	8.65615	8.71825	8.51792	8.50458
		AVE	8.51999	7.96408	9.3831	9.38218	8.75252	8.62617	8.69349	8.55641	8.48771
		SD	0.0935336	0.0382603	0.0960143	0.0284534	0.0396779	0.0247948	0.019567	0.0307297	0.0130342
	28	Repetitions	CK	S	S+T1	S+T2	S+T3	S+T4	S+T5	S+T6	S+T7
		1	8.82175	8.23456	9.6693	9.80983	9.67229	9.53084	9.26703	9.20102	8.87764
		2	8.80565	8.25687	9.78154	9.7636	9.62905	9.57063	9.23391	9.19458	8.95492
		3	8.84107	8.18994	9.65826	9.78361	9.57753	9.5474	9.23874	9.24012	8.98482
		AVE	8.82282	8.22712	9.70303	9.78568	9.62629	9.54962	9.24656	9.21191	8.93913
		SD	0.0144801	0.0278255	0.0556953	0.01893	0.0387348	0.0163201	0.0146082	0.0201223	0.0451587
	Explanation：This table is the raw data of soluble sugar content determination. We set up three repetitions in each experiment to ensure the reliability of the results, and finally take the average as the final result.

[truncated: 5 more sheets: soluble protein content, O2- content, H2S content, LCD content, Biomass]
